# Supplementary material
Source: Research Square preprint supplement (doi:10.21203/rs.3.rs-9579585/v1)
Supplement: Supplementary file 1 [file 675705c33bfd79d98e7ad030.docx]

**Graph 1** shows the soil physical-chemical characters from the ant nests

**Graph 2**. Number of samples in the study are of two six months period. The blue line shows number of samples in the study area during the first six months period of Jan 2023 – JUN 2023. The Red line shows number of samples in the study area during the second six months period of JUL 2023 – DEC 2023. The number of samples in the second six months period is higher comparing to the first six months period of sample.
